# Supplementary material
Source: Research Square preprint supplement (doi:10.21203/rs.3.rs-9261484/v1)
Supplement: Supplementary file 1 [file Adaptive BTLCGLMM-Supplementaryfile1.pdf › Adaptive BTLCGLMM-Supplementaryfile1/Adaptive BTLCGLMM-Supplementaryfile1.pdf]

# Supplementary Information for Adaptive Bayesian Transfer Learning under Compositional Generalized Linear Mixed Model for Microbiome Data Analysis

Xiaojing Luo<sup>1</sup> and Qinqin Hu<sup>1\*</sup>

<sup>1\*</sup>School of Mathematics and Statistics, Shandong University, No.180 Wenhua West Road, Weihai, 264209, Shandong, People's Republic of China.

\*Corresponding author(s). E-mail(s): [qqhu@sdu.edu.cn](mailto:qqhu@sdu.edu.cn);

## Appendix A Supplementary Materials

**Table A1** Model Performance Comparison between the Proposed Methods with Increasing Source Sample Size  $n_S$  under Different Sparsity for Continuous Outcomes

| $n_S$               | Model                        | Deviance | $R^2$ | MSE   | MAE   |
|---------------------|------------------------------|----------|-------|-------|-------|
| 6 Moderate Effects  |                              |          |       |       |       |
| –                   | Targetonly                   | 435.540  | 0.545 | 4.859 | 1.750 |
| 100                 | BTL-CGLMM ( $\alpha = 1$ )   | 253.554  | 0.928 | 0.778 | 0.695 |
|                     | BTL-CGLMM ( $\alpha = 0.3$ ) | 271.746  | 0.907 | 0.991 | 0.773 |
|                     | Adaptive BTL-CGLMM           | 239.733  | 0.926 | 0.773 | 0.678 |
|                     | Adaptive BTL-CGLM            | 266.901  | 0.908 | 0.958 | 0.765 |
| 300                 | BTL-CGLMM ( $\alpha = 1$ )   | 345.338  | 0.826 | 1.877 | 1.089 |
|                     | BTL-CGLMM ( $\alpha = 0.3$ ) | 332.506  | 0.846 | 1.654 | 1.022 |
|                     | Adaptive BTL-CGLMM           | 245.268  | 0.919 | 0.841 | 0.703 |
|                     | Adaptive BTL-CGLM            | 268.928  | 0.902 | 1.011 | 0.776 |
| 500                 | BTL-CGLMM ( $\alpha = 1$ )   | 361.723  | 0.796 | 2.212 | 1.181 |
|                     | BTL-CGLMM ( $\alpha = 0.3$ ) | 342.342  | 0.831 | 1.823 | 1.073 |
|                     | Adaptive BTL-CGLMM           | 247.621  | 0.916 | 0.868 | 0.712 |
|                     | Adaptive BTL-CGLM            | 269.650  | 0.902 | 1.016 | 0.780 |
| 12 Moderate Effects |                              |          |       |       |       |
| –                   | Targetonly                   | 446.805  | 0.562 | 5.649 | 1.870 |
| 100                 | BTL-CGLMM ( $\alpha = 1$ )   | 242.746  | 0.947 | 0.683 | 0.650 |
|                     | BTL-CGLMM ( $\alpha = 0.3$ ) | 268.860  | 0.913 | 1.045 | 0.771 |
|                     | Adaptive BTL-CGLMM           | 254.131  | 0.898 | 1.192 | 0.785 |
|                     | Adaptive BTL-CGLM            | 283.223  | 0.856 | 1.659 | 0.914 |
| 300                 | BTL-CGLMM ( $\alpha = 1$ )   | 338.039  | 0.868 | 1.740 | 1.051 |
|                     | BTL-CGLMM ( $\alpha = 0.3$ ) | 318.573  | 0.890 | 1.435 | 0.955 |
|                     | Adaptive BTL-CGLMM           | 250.799  | 0.911 | 1.074 | 0.760 |
|                     | Adaptive BTL-CGLM            | 284.798  | 0.859 | 1.643 | 0.919 |
| 500                 | BTL-CGLMM ( $\alpha = 1$ )   | 356.528  | 0.841 | 2.091 | 1.154 |
|                     | BTL-CGLMM ( $\alpha = 0.3$ ) | 330.118  | 0.878 | 1.609 | 1.010 |
|                     | Adaptive BTL-CGLMM           | 251.396  | 0.914 | 1.049 | 0.756 |
|                     | Adaptive BTL-CGLM            | 284.617  | 0.861 | 1.614 | 0.911 |

$n_S$  denotes the source sample size and only applies to methods that incorporate source data. Adaptive BTL-CGLMM: the Adaptive Bayesian Transfer Learning under Compositional Generalized Linear Mixed Model proposed in this study; Adaptive BTL-CGLM: a simplified version of Adaptive BTL-CGLMM that ignores the dependencies among samples; BTL-CGLMM ( $\alpha = 1$ ) and BTL-CGLMM ( $\alpha = 0.3$ ): the Bayesian Transfer Learning under Compositional Generalized Linear Mixed Model proposed in this study with a fixed parameter  $\alpha$ ; Targetonly: directly applies the Bayesian Compositional Generalized Linear Mixed Model (BCGLMM) to the target dataset. Deviance,  $R^2$ , MSE, and MAE are evaluation metrics for the continuous outcome.

**Table A2** Model Performance Comparison between the Proposed Methods with Increasing Source Sample Size  $n_S$  under Different Sparsity for Binary Outcomes

| $n_S$               | Model                        | Deviance | MSE   | MAE   | Misclassification Rate |
|---------------------|------------------------------|----------|-------|-------|------------------------|
| 6 Moderate Effects  |                              |          |       |       |                        |
| –                   | Targetonly                   | 118.102  | 0.202 | 0.411 | 0.310                  |
| 100                 | BTL-CGLMM ( $\alpha = 1$ )   | 45.776   | 0.051 | 0.196 | 0.011                  |
|                     | BTL-CGLMM ( $\alpha = 0.3$ ) | 71.136   | 0.096 | 0.291 | 0.017                  |
|                     | Adaptive BTL-CGLMM           | 57.023   | 0.069 | 0.240 | 0.006                  |
|                     | Adaptive BTL-CGLM            | 87.501   | 0.133 | 0.343 | 0.064                  |
| 300                 | BTL-CGLMM ( $\alpha = 1$ )   | 56.763   | 0.074 | 0.232 | 0.050                  |
|                     | BTL-CGLMM ( $\alpha = 0.3$ ) | 82.070   | 0.120 | 0.327 | 0.044                  |
|                     | Adaptive BTL-CGLMM           | 53.466   | 0.062 | 0.227 | 0.007                  |
|                     | Adaptive BTL-CGLM            | 89.397   | 0.137 | 0.349 | 0.067                  |
| 500                 | BTL-CGLMM ( $\alpha = 1$ )   | 61.245   | 0.085 | 0.244 | 0.074                  |
|                     | BTL-CGLMM ( $\alpha = 0.3$ ) | 77.684   | 0.111 | 0.311 | 0.054                  |
|                     | Adaptive BTL-CGLMM           | 50.246   | 0.057 | 0.215 | 0.005                  |
|                     | Adaptive BTL-CGLM            | 89.241   | 0.137 | 0.349 | 0.066                  |
| 12 Moderate Effects |                              |          |       |       |                        |
| –                   | Targetonly                   | 117.968  | 0.203 | 0.414 | 0.315                  |
| 100                 | BTL-CGLMM ( $\alpha = 1$ )   | 42.147   | 0.045 | 0.182 | 0.005                  |
|                     | BTL-CGLMM ( $\alpha = 0.3$ ) | 70.040   | 0.093 | 0.289 | 0.011                  |
|                     | Adaptive BTL-CGLMM           | 54.817   | 0.065 | 0.233 | 0.004                  |
|                     | Adaptive BTL-CGLM            | 87.017   | 0.134 | 0.339 | 0.102                  |
| 300                 | BTL-CGLMM ( $\alpha = 1$ )   | 46.814   | 0.056 | 0.196 | 0.027                  |
|                     | BTL-CGLMM ( $\alpha = 0.3$ ) | 77.623   | 0.109 | 0.314 | 0.026                  |
|                     | Adaptive BTL-CGLMM           | 50.225   | 0.056 | 0.216 | 0.002                  |
|                     | Adaptive BTL-CGLM            | 89.392   | 0.139 | 0.347 | 0.110                  |
| 500                 | BTL-CGLMM ( $\alpha = 1$ )   | 54.683   | 0.072 | 0.221 | 0.057                  |
|                     | BTL-CGLMM ( $\alpha = 0.3$ ) | 77.467   | 0.110 | 0.312 | 0.032                  |
|                     | Adaptive BTL-CGLMM           | 47.619   | 0.052 | 0.206 | 0.002                  |
|                     | Adaptive BTL-CGLM            | 88.461   | 0.136 | 0.345 | 0.100                  |

$n_S$  denotes the source sample size and only applies to methods that incorporate source data. Adaptive BTL-CGLMM: the Adaptive Bayesian Transfer Learning under Compositional Generalized Linear Mixed Model proposed in this study; Adaptive BTL-CGLM: a simplified version of Adaptive BTL-CGLMM that ignores the dependencies among samples; BTL-CGLMM ( $\alpha = 1$ ) and BTL-CGLMM ( $\alpha = 0.3$ ): the Bayesian Transfer Learning under Compositional Generalized Linear Mixed Model proposed in this study with a fixed parameter  $\alpha$ ; Targetonly: directly applies the Bayesian Compositional Generalized Linear Mixed Model (BCGLMM) to the target dataset. Deviance, MSE (Mean Squared Error), MAE (Mean Absolute Error), and Misclassification Rate are evaluation metrics for the binary outcome.

**Table A3** Model Performance Comparison between the Proposed Methods with Different Sources under Heterogeneous Source Dataset for Continuous Outcomes

| $\xi$ | Model                        | Deviance | $R^2$ | MSE   | MAE   |
|-------|------------------------------|----------|-------|-------|-------|
| –     | Targetonly                   | 435.540  | 0.545 | 4.859 | 1.750 |
| 0.05  | BTL-CGLMM ( $\alpha = 1$ )   | 331.189  | 0.849 | 1.628 | 1.016 |
|       | BTL-CGLMM ( $\alpha = 0.3$ ) | 319.358  | 0.865 | 1.450 | 0.960 |
|       | Adaptive BTL-CGLMM           | 255.638  | 0.908 | 0.956 | 0.746 |
|       | Adaptive BTL-CGLM            | 268.234  | 0.907 | 0.976 | 0.771 |
| 0.5   | BTL-CGLMM ( $\alpha = 1$ )   | 333.639  | 0.845 | 1.668 | 1.029 |
|       | BTL-CGLMM ( $\alpha = 0.3$ ) | 320.714  | 0.863 | 1.471 | 0.968 |
|       | Adaptive BTL-CGLMM           | 252.832  | 0.910 | 0.934 | 0.737 |
|       | Adaptive BTL-CGLM            | 268.733  | 0.905 | 0.984 | 0.774 |
| 1     | BTL-CGLMM ( $\alpha = 1$ )   | 345.859  | 0.825 | 1.882 | 1.096 |
|       | BTL-CGLMM ( $\alpha = 0.3$ ) | 326.871  | 0.854 | 1.565 | 0.999 |
|       | Adaptive BTL-CGLMM           | 252.571  | 0.912 | 0.917 | 0.733 |
|       | Adaptive BTL-CGLM            | 268.963  | 0.905 | 0.983 | 0.774 |
| 2     | BTL-CGLMM ( $\alpha = 1$ )   | 381.970  | 0.744 | 2.738 | 1.321 |
|       | BTL-CGLMM ( $\alpha = 0.3$ ) | 350.704  | 0.816 | 1.985 | 1.129 |
|       | Adaptive BTL-CGLMM           | 256.577  | 0.907 | 0.968 | 0.749 |
|       | Adaptive BTL-CGLM            | 270.373  | 0.902 | 1.018 | 0.783 |

$\xi$  denotes the discrepancy between the source and the target effect, and only applies to methods that incorporate source data.

Adaptive BTL-CGLMM: the Adaptive Bayesian Transfer Learning under Compositional Generalized Linear Mixed Model proposed in this study; Adaptive BTL-CGLM: a simplified version of Adaptive BTL-CGLMM that ignores the dependencies among samples; BTL-CGLMM ( $\alpha = 1$ ) and BTL-CGLMM ( $\alpha = 0.3$ ): the Bayesian Transfer Learning under Compositional Generalized Linear Mixed Model proposed in this study with a fixed parameter  $\alpha$ ; Targetonly: directly applies the Bayesian Compositional Generalized Linear Mixed Model (BCGLMM) to the target dataset. Deviance,  $R^2$  (R-squared), MSE (Mean Squared Error), and MAE (Mean Absolute Error) are evaluation metrics for the continuous outcome.

**Table A4** Model Performance Comparison between the Proposed Methods with Different Sources under Heterogeneous Source Dataset for Binary Outcomes

| $\xi$ | Model                        | Deviance | MSE   | MAE   | Misclassification Rate |
|-------|------------------------------|----------|-------|-------|------------------------|
| –     | Targetonly                   | 118.102  | 0.202 | 0.411 | 0.310                  |
| 0.05  | BTL-CGLMM ( $\alpha = 1$ )   | 49.301   | 0.059 | 0.206 | 0.027                  |
|       | BTL-CGLMM ( $\alpha = 0.3$ ) | 73.517   | 0.102 | 0.298 | 0.034                  |
|       | Adaptive BTL-CGLMM           | 54.752   | 0.065 | 0.231 | 0.007                  |
|       | Adaptive BTL-CGLM            | 87.706   | 0.134 | 0.344 | 0.061                  |
| 0.5   | BTL-CGLMM ( $\alpha = 1$ )   | 48.768   | 0.058 | 0.205 | 0.026                  |
|       | BTL-CGLMM ( $\alpha = 0.3$ ) | 73.436   | 0.102 | 0.297 | 0.030                  |
|       | Adaptive BTL-CGLMM           | 54.717   | 0.065 | 0.231 | 0.007                  |
|       | Adaptive BTL-CGLM            | 87.723   | 0.134 | 0.343 | 0.065                  |
| 1     | BTL-CGLMM ( $\alpha = 1$ )   | 47.671   | 0.057 | 0.200 | 0.025                  |
|       | BTL-CGLMM ( $\alpha = 0.3$ ) | 73.200   | 0.101 | 0.297 | 0.032                  |
|       | Adaptive BTL-CGLMM           | 54.740   | 0.065 | 0.231 | 0.007                  |
|       | Adaptive BTL-CGLM            | 88.607   | 0.136 | 0.346 | 0.071                  |
| 2     | BTL-CGLMM ( $\alpha = 1$ )   | 46.899   | 0.056 | 0.197 | 0.028                  |
|       | BTL-CGLMM ( $\alpha = 0.3$ ) | 76.004   | 0.107 | 0.307 | 0.034                  |
|       | Adaptive BTL-CGLMM           | 54.481   | 0.065 | 0.230 | 0.008                  |
|       | Adaptive BTL-CGLM            | 88.282   | 0.135 | 0.346 | 0.065                  |

$\xi$  denotes the discrepancy between the source and the target effect, and only applies to methods that incorporate source data.

Adaptive BTL-CGLMM: the Adaptive Bayesian Transfer Learning under Compositional Generalized Linear Mixed Model proposed in this study; Adaptive BTL-CGLM: a simplified version of Adaptive BTL-CGLMM that ignores the dependencies among samples; BTL-CGLMM ( $\alpha = 1$ ) and BTL-CGLMM ( $\alpha = 0.3$ ): the Bayesian Transfer Learning under Compositional Generalized Linear Mixed Model proposed in this study with a fixed parameter  $\alpha$ ; Targetonly: directly applies the Bayesian Compositional Generalized Linear Mixed Model (BCGLMM) to the target dataset. Deviance, MSE (Mean Squared Error), MAE (Mean Absolute Error), and Misclassification Rate are evaluation metrics for the binary outcome.

**Table A5** Model Performance Comparison between the Proposed Methods with Increasing Source Sample Size  $n_S$  under Heterogeneous Source Dataset for Continuous Outcomes

| $n_S$ | Model                        | Deviance | $R^2$ | MSE   | MAE   |
|-------|------------------------------|----------|-------|-------|-------|
| –     | Targetonly                   | 435.540  | 0.545 | 4.859 | 1.750 |
| 100   | BTL-CGLMM ( $\alpha = 1$ )   | 302.536  | 0.885 | 1.240 | 0.885 |
|       | BTL-CGLMM ( $\alpha = 0.3$ ) | 300.734  | 0.886 | 1.220 | 0.880 |
|       | Adaptive BTL-CGLMM           | 248.511  | 0.916 | 0.873 | 0.717 |
|       | Adaptive BTL-CGLM            | 268.628  | 0.906 | 0.984 | 0.773 |
| 300   | BTL-CGLMM ( $\alpha = 1$ )   | 349.201  | 0.819 | 1.946 | 1.112 |
|       | BTL-CGLMM ( $\alpha = 0.3$ ) | 332.570  | 0.846 | 1.654 | 1.027 |
|       | Adaptive BTL-CGLMM           | 255.020  | 0.909 | 0.949 | 0.743 |
|       | Adaptive BTL-CGLM            | 269.800  | 0.901 | 1.027 | 0.782 |
| 500   | BTL-CGLMM ( $\alpha = 1$ )   | 365.798  | 0.788 | 2.294 | 1.206 |
|       | BTL-CGLMM ( $\alpha = 0.3$ ) | 343.711  | 0.829 | 1.843 | 1.084 |
|       | Adaptive BTL-CGLMM           | 262.845  | 0.900 | 1.037 | 0.774 |
|       | Adaptive BTL-CGLM            | 268.736  | 0.905 | 0.993 | 0.774 |

$n_S$  denotes the source sample size and only applies to methods that incorporate source data. Adaptive BTL-CGLMM: the Adaptive Bayesian Transfer Learning under Compositional Generalized Linear Mixed Model proposed in this study; Adaptive BTL-CGLM: a simplified version of Adaptive BTL-CGLMM that ignores the dependencies among samples; BTL-CGLMM ( $\alpha = 1$ ) and BTL-CGLMM ( $\alpha = 0.3$ ): the Bayesian Transfer Learning under Compositional Generalized Linear Mixed Model proposed in this study with a fixed parameter  $\alpha$ ; Targetonly: directly applies the Bayesian Compositional Generalized Linear Mixed Model (BCGLMM) to the target dataset. Deviance,  $R^2$  (R-squared), MSE (Mean Squared Error), and MAE (Mean Absolute Error) are evaluation metrics for the continuous outcome.

**Table A6** Model Performance Comparison between the Proposed Methods with Increasing Source Sample Size  $n_S$  under Heterogeneous Source Dataset for Binary Outcomes

| $n_S$ | Model                        | Deviance | MSE   | MAE   | Misclassification Rate |
|-------|------------------------------|----------|-------|-------|------------------------|
| –     | Targetonly                   | 118.102  | 0.202 | 0.411 | 0.310                  |
| 100   | BTL-CGLMM ( $\alpha = 1$ )   | 43.578   | 0.047 | 0.188 | 0.007                  |
|       | BTL-CGLMM ( $\alpha = 0.3$ ) | 75.368   | 0.105 | 0.305 | 0.026                  |
|       | Adaptive BTL-CGLMM           | 57.227   | 0.069 | 0.241 | 0.007                  |
|       | Adaptive BTL-CGLM            | 88.723   | 0.136 | 0.347 | 0.071                  |
| 300   | BTL-CGLMM ( $\alpha = 1$ )   | 54.388   | 0.070 | 0.222 | 0.047                  |
|       | BTL-CGLMM ( $\alpha = 0.3$ ) | 68.015   | 0.091 | 0.278 | 0.032                  |
|       | Adaptive BTL-CGLMM           | 52.223   | 0.061 | 0.222 | 0.007                  |
|       | Adaptive BTL-CGLM            | 87.728   | 0.134 | 0.344 | 0.062                  |
| 500   | BTL-CGLMM ( $\alpha = 1$ )   | 59.032   | 0.081 | 0.235 | 0.075                  |
|       | BTL-CGLMM ( $\alpha = 0.3$ ) | 64.342   | 0.086 | 0.263 | 0.046                  |
|       | Adaptive BTL-CGLMM           | 50.836   | 0.059 | 0.217 | 0.007                  |
|       | Adaptive BTL-CGLM            | 88.426   | 0.135 | 0.346 | 0.066                  |

$n_S$  denotes the source sample size and only applies to methods that incorporate source data. Adaptive BTL-CGLMM: the Adaptive Bayesian Transfer Learning under Compositional Generalized Linear Mixed Model proposed in this study; Adaptive BTL-CGLM: a simplified version of Adaptive BTL-CGLMM that ignores the dependencies among samples; BTL-CGLMM ( $\alpha = 1$ ) and BTL-CGLMM ( $\alpha = 0.3$ ): the Bayesian Transfer Learning under Compositional Generalized Linear Mixed Model proposed in this study with a fixed parameter  $\alpha$ ; Targetonly: directly applies the Bayesian Compositional Generalized Linear Mixed Model (BCGLMM) to the target dataset. Deviance, MSE (Mean Squared Error), MAE (Mean Absolute Error), and Misclassification Rate are evaluation metrics for the binary outcome.
